# Supplementary material for: NAMPT/NAD+ signaling drives neutrophil dysfunction and enhances bacterial infection susceptibility in cancer patients
Source: Research Square preprint supplement (doi:10.21203/rs.3.rs-6098692/v1), 2025-03-24
Supplement: Supplementary file 2 [file dfeae4a49a4739c3e8f1c4bc.docx]

Reviewer access details:

Unique link: https://www.ebi.ac.uk/pride/review-dataset/b3d5def8c07047d0b3c9d575ab2bec92

Project accession: PXD052631

Token: 8zx9dyhhN5it

Alternatively, the reviewer can access the dataset by logging into the PRIDE website using the following

account details:

Username: reviewer_pxd052631@ebi.ac.uk

Password: sAjEjcKX7jZk
